1 **Two founder variants account for over 90% of pathogenic BRCA alleles in Orkney and Shetland**

2

3 Shona M. Kerr<sup>1</sup>, Lucija Klaric<sup>1</sup>, Marisa D. Muckian<sup>2,3</sup>, Emma Cowan<sup>4</sup>, Lesley Snadden<sup>4</sup>, Gannie Tzoneva<sup>5</sup>,

4 Alan R. Shuldiner<sup>5</sup>, Zosia Miedzybrodzka<sup>4,6</sup> and James F. Wilson<sup>†1,2,7</sup>

5

6 <sup>1</sup>MRC Human Genetics Unit, University of Edinburgh, Institute of Genetics and Cancer, Western General

7 Hospital, Crewe Road, Edinburgh, EH4 2XU, UK

8 <sup>2</sup>Centre for Global Health Research, Usher Institute, University of Edinburgh, Teviot Place, Edinburgh EH8

9 9AG, UK

10 <sup>3</sup>Department of Infectious Disease Epidemiology, London School of Hygiene & Tropical Medicine, Keppel

11 Street, London WC1E 7HT, UK

12 <sup>4</sup> Department of Medical Genetics, Ashgrove House, NHS Grampian, Aberdeen, AB25 2ZA, UK

13 <sup>5</sup> Regeneron Genetics Center, Tarrytown, NY, USA

14 <sup>6</sup>Medical Genetics Group, University of Aberdeen, Polwarth Building, Aberdeen, AB25 2ZD, UK

15 <sup>7</sup>Centre for Genomic and Experimental Medicine, Institute of Genetics and Cancer, University of

16 Edinburgh, Edinburgh, EH4 2XU, UK

17

18 † To whom correspondence should be addressed: [jim.wilson@ed.ac.uk](mailto:jim.wilson@ed.ac.uk)

19 **Abstract**

20 For breast and ovarian cancer risk assessment in the isolated populations of the Northern Isles of Orkney  
21 and Shetland (in Scotland, UK) and their diasporas, quantifying genetically drifted *BRCA1* and *BRCA2*  
22 pathogenic variants is important. Two actionable variants in these genes have reached much higher  
23 frequencies than in cosmopolitan UK populations. Here, we report a *BRCA2* splice acceptor variant, c.517-  
24 2A>G, found in breast and ovarian cancer families from Shetland. We investigated the frequency and  
25 origin of this variant in a population-based research cohort of people of Shetland ancestry, VIKING I. The  
26 variant segregates with female breast and ovarian cancer in diagnosed cases and is classified as  
27 pathogenic. Exome sequence data from 2,108 participants with three or more Shetlandic grandparents in  
28 VIKING I was used to estimate the population prevalence of c.517-2A>G in Shetlanders. Nine VIKING I  
29 research volunteers carry this variant, on a shared haplotype (carrier frequency 0.4%). This frequency is  
30 ~130-fold higher than in UK Biobank, where the small group of carriers has a different haplotype. Records  
31 of birth, marriage and death indicate genealogical linkage of VIKING I carriers to a founder from the Isle of  
32 Whalsay, Shetland, similar to our observations for the *BRCA1* founder variant from Westray, Orkney. In  
33 total, 93.5% of pathogenic BRCA variant carriers in Northern Isles exomes are accounted for by these two  
34 drifted variants. We thus provide the scientific evidence of an opportunity for screening people of  
35 Orcadian and Shetlandic origins for each drifted pathogenic variant, particularly women with Westray or  
36 Whalsay ancestry.

37

38 **Keywords**

39 Breast cancer, BRCA2, rare variants, isolate population

## 40 **Introduction**

41 Pathogenic variants in *BRCA1* and *BRCA2* confer a high lifetime risk of breast, ovarian and, for *BRCA2*,  
42 male breast and prostate cancer (1-3). Genetic testing for disease-associated variants in these genes is  
43 increasingly available as part of routine clinical care, to enable not only early detection and risk reduction,  
44 but also to guide cancer treatment decisions. The genes are considered “tier 1” genes by the Centers for  
45 Disease Control and Prevention Office of Public Health Genomics, on the basis that early detection of  
46 pathogenic variants will have a positive effect on public health. Predictive testing of unaffected family  
47 members is well established, with female pre-symptomatic carriers of pathogenic variants being offered  
48 risk-reducing salpingo-oophorectomy and mastectomy, and early onset annual MRI breast screening.  
49 Pathogenic variants in *BRCA2* also increase risk of prostate cancer and male breast cancer (4), with male  
50 pre-symptomatic carriers typically being offered prostate-specific antigen screening in the NHS.  
51 Compellingly, the Icelandic p.Asn257LysfsTer17 founder variant in *BRCA2* (previously termed 999del5 (5))  
52 was associated with a shorter lifespan for both female carriers (effect of the variant, -9.3 years) and male  
53 carriers (effect of the variant, -4.6 years) (6).

54 In isolate populations, a pathogenic variant present in a founding or early member can become more  
55 frequent in later generations. Pathogenic variants in *BRCA1* and *BRCA2* that have drifted up in frequency  
56 due to founder events have been described in many isolate and founder communities worldwide, notably  
57 Ashkenazi and Sephardi Jews (7, 8), and Icelanders (5), as well as in larger populations (9).

58 The Northern Isles of Scotland – the Orkney and Shetland archipelagos - contain the most isolated of all  
59 British and Irish populations, with the highest degree of Norse admixture. The genome-wide  
60 distinctiveness revealed at common variants (10) is also reflected in the spectrum of rare and ultra-rare  
61 variation: many such variants are enriched in the Shetlandic population (11). This pervasive genetic drift  
62 also influences variants of clinical importance. Examples in the Northern Isles include a pathogenic *BRCA1*  
63 founder variant that has drifted to high frequency in Orkney (12), and an actionable *KCNH2* Long QT  
64 Syndrome variant in Shetland (13). Here, we survey the landscape of pathogenic *BRCA1*, (MIM#113705)  
65 *BRCA2* (MIM#600185) and other breast cancer risk variants in the Northern Isles of Scotland.

66 The NHS Grampian clinical genetics team initially observed the *BRCA2* splice acceptor variant, c.517-2A>G,  
67 in breast and ovarian cancer cases from Shetland. The interpretation that this base substitution is a  
68 pathogenic variant was demonstrated independently by multifactorial likelihood quantitative analysis  
69 (definitely pathogenic, posterior probability 0.9994), together with co-segregation and tumour pathology  
70 (14). The c.517-2A>G variant (also known as IVS6-2A>G) has been reported in multiple individuals affected  
71 with Hereditary Breast and Ovarian Cancer worldwide, and is classed as pathogenic (reviewed by an  
72 expert panel) in ClinVar (15), accession number VCV000051801. This *BRCA2* variant lies in a canonical  
73 splice acceptor site and is predicted using a range of tools to affect mRNA splicing, resulting in a  
74 significantly altered protein due to exon skipping (16). Experimental evidence *in vitro* supports these  
75 bioinformatic predictions (16, 17).

76 Viking Genes ([viking.ed.ac.uk](http://viking.ed.ac.uk)) comprises three cohort studies aiming to explore the genetic causes of  
77 disease – the Orkney Complex Disease Study (ORCADES), VIKING I and VIKING II/III. VIKING I contains a  
78 rich data resource of more than 2,000 deeply phenotyped and exome-sequenced research subjects with  
79 three or four grandparents from Shetland, whereas ORCADES is a similar-sized cohort of participants from  
80 Orkney. Most recently, VIKING II/III is a worldwide cohort of 6,000 people, recruited online, with ancestry  
81 from the Northern or Western Isles of Scotland (18). The UK Biobank is a cosmopolitan biomedical  
82 database containing genetic, lifestyle and health information from half a million participants in the UK  
83 (19). Here, we report the ascertainment of the *BRCA2* pathogenic variant c.517-2A>G in both clinical care  
84 in cancer families, and research volunteers, from Shetland. We investigate relatedness of the variant  
85 carriers in Shetland using genealogy, infer origins, compare haplotypes in VIKING I and UK Biobank carrier  
86 participants and estimate population frequencies of pathogenic BRCA variants in Scottish island founder  
87 populations both individually and collectively.

88

## 89 **Materials and Methods**

### 90 *Genotyping*

91 DNA from all VIKING I participants was used for genome-wide genotyping on the GSA BeadChip (Illumina)  
92 at the Regeneron Genetics Center. Monomorphic genotypes and genotypes with more than 2% of

93 missingness and Hardy-Weinberg equilibrium (HWE)  $p < 10^{-6}$  were removed, as well as individuals with  
94 more than 3% of missingness. Details of genotyping, sample and variant quality control of UK Biobank  
95 genotyping data are described in Bycroft *et al* (20).

#### 96 *DNA Sequencing and Annotation*

97 The fully quality-controlled exome sequence data set of 2,108 VIKING I sequences (843 male and 1,265  
98 female participants) passed all genotype quality control thresholds as described previously for the exomes  
99 in the ORCADES cohort (12). The data was prepared at the Regeneron Genetics Center, following the  
100 process detailed for UK Biobank (21). Details of the quality control of whole exome sequencing on the  
101 200,000 participants from the UK Biobank are described in Backman *et al* (22). For Viking Genes, exonic  
102 variants passing QC in *BRCA1*, *BRCA2* and other cancer risk genes were filtered against ClinVar (15)  
103 (accession date 28th March 2023) and Pathogenic/Likely Pathogenic variants were retained, irrespective  
104 of star status. Pre-designed primers (Hs00585575, Thermo Fisher Scientific) were used to generate a PCR  
105 fragment of 268 base pairs from genomic DNA for analysis. The *BRCA2* c.517-2A>G, rs81002858 variant  
106 was confirmed in VIKING I carriers by Sanger sequencing on an Applied Biosystems 3730xl Genetic  
107 Analyser. All nine heterozygous variant calls from the VIKING I exome dataset were verified.

#### 108 *Haplotype analysis*

109 The VIKING I array genotype data were phased using Shapeit2 v2r837 (23), with the duoHMM option that  
110 uses the family-based nature of the data (24). Prior to phasing, the array genotype data were lifted over  
111 from the genome build GRCh38 to GRCh37 using LiftOver, followed by quality control against the TOPMED  
112 reference panel with Rayner's HRC-1000G-check-bim (v4.2.13) script that was downloaded from  
113 <https://www.well.ox.ac.uk/~wrayner/tools/>. UK Biobank data were interrogated to ascertain the  
114 frequency of the variant of interest. Details of phasing of UK Biobank genotyping data have been  
115 described (20). Then, the phased genotypes were used to determine a shared haplotype around c.517-  
116 2A>G using the fine method described previously (13). All methods were performed using R 4.0.2 (R Core  
117 Team 2020 <https://www.R-project.org/>). Haplotypes were defined with custom-built in-house scripts in R.  
118 Data handling was performed using data.table and tidyverse R packages. Plots were generated using  
119 ggplot2.

120 A single variant-based haplotype search was performed to determine the haplotype length between the  
121 different VIKING I carrier kindreds, and with the UK Biobank carrier individuals, using a stepwise approach.  
122 Using phased genotype data, starting from the rs81002858 rare variant, one SNP at a time was added to  
123 define a haplotype. The procedure was repeated until haplotypes of two individuals (both known carriers)  
124 no longer matched, both upstream and downstream of the rare variant, providing variant-level resolution  
125 of the haplotype length. The procedure was repeated for all pairs of individuals identified as carriers based  
126 on the exome sequencing data, both in the VIKING I and UK Biobank datasets. The shortest shared  
127 haplotype from VIKING I was then merged with the shortest shared haplotype from the UK Biobank, to  
128 compare whether the haplotypes match.

### 129 *EHR Data Linkage in VIKING I*

130 NHS routine datasets linked to VIKING I participants in July 2021, including the Scottish Cancer Registry  
131 SMR06, were accessed using a secure process, as described previously (12).

132

## 133 **Results**

### 134 *Clinical ascertainment of the BRCA2 c.517-2A>G variant*

135 Eleven women from four Shetland families presenting with *BRCA2*-related cancers were found to have the  
136 *BRCA2* c.517-2A>G variant, as part of routine clinical care. The family branches share some common  
137 surnames, but the branches could not be genealogically linked. Two of the branches overlap  
138 genealogically with two VIKING I families with the same variant. To date, five of these 11 clinically  
139 ascertained carriers have had breast or ovarian cancer. Not all would have met the criteria for genetic  
140 testing in the mainstream NHS setting (see Supplementary Methods), without the context of the wider  
141 family health history.

### 142 *Population frequencies of the BRCA2 c.517-2A>G variant*

143 Data from 2,108 VIKING I participants passed all exome sequence and genotype quality control thresholds.  
144 There are nine heterozygous carriers of the *BRCA2* c.517-2A>G variant in the VIKING I exome dataset, of  
145 whom six are female. The Genome Aggregation Database (gnomAD v4.0) (25), containing over half a  
146 million exomes from unrelated individuals, has 14 heterozygous carriers of the c.517-2A>G variant (Table

147 1). Consistent with this rarity, the variant is not observed in 2,090 participants in ORCADES (12). In good  
148 agreement with gnomAD, 458,838 whole genome sequences from the UK Biobank (26) contain fifteen  
149 instances (Table 1).

150

151 We have access to exome sequence data from 200,000 individuals from UK Biobank, six of whom carry the  
152 variant. These six were born and live in England, mostly in Yorkshire. Variant carriers are also reported in a  
153 national UK repository of variants in cancer predisposition genes in cancer patients, CanVar-UK (27). There  
154 are 35 carriers in this dataset (Table 1), five of whom are recorded as of non-European heritage. The  
155 variant was also noted in one participant in a study of Japanese women with breast cancer (28).

#### 156 *Origin of the c.517-2A>G variant in Shetland*

157 Three out of nine of the VIKING I variant carriers had all four grandparents born in the Isle of Whalsay, one  
158 of the North Isles of Shetland, and five of them had at least one Whalsay grandparent. Of all 36  
159 grandparents of the carriers, 14 (39%) were from Whalsay, with most of the remainder coming from other  
160 parishes or isles of Shetland (Figure 1). The *BRCA2* pathogenic variant c.517-2A>G in Shetland thus shows  
161 evidence of a founder from the parish of Whalsay.

162

163 Church records and data from the Scottish register of births, marriages and deaths traced six of the nine  
164 research carriers to lineages with an origin in a couple born over 200 years ago on the island of Whalsay,  
165 in the Shetland Isles (Figure 2). A further carrier descends from the same ancestral surname in the same  
166 isle, potentially linking into the pedigree ~300 years ago (not shown), but the genealogical records do not  
167 survive to prove the link. The c.517-2A>G families in the research cohort can thus be traced back to this  
168 family, apart from two closely related carriers who have no genealogical links and no known ancestors  
169 from Whalsay. This “Family B” is not shown in Figure 2, and is probably the result of an ancestral non-  
170 paternity event, given they share a haplotype with the main kindred and its outlier (see below).

171

172 *c.517-2A>G carriers in VIKING I and UK Biobank do not share a common haplotype*

173 All nine heterozygous c.517-2A>G carriers in VIKING I share the same haplotype around the variant locus,  
174 with a minimum length of 3.6 Mb (Figure 3). Analysis of haplotypes in the genotype data from six UK  
175 Biobank participants carrying the variant showed that all but one share a minimum ~0.7 Mb haplotype  
176 around the variant. However, this was different to the Whalsay haplotype from VIKING I, and is noticeably  
177 shorter: on average 1.4 Mb are shared vs. 9 Mb among the Shetlanders (excluding relatives closer than  
178 fifth degree). The final UK Biobank carrier shares neither of these haplotypes.

179

#### 180 *Penetrance of BRCA2 c.517-2A>G*

181 Linkage to routine NHS data in the electronic health record (EHR) provides a longitudinal component to  
182 the Viking Genes research cohorts, and affords the opportunity for unbiased penetrance estimates. All  
183 nine c.517-2A>G carriers gave consent for EHR linkage, and the mean age of the six female carriers at time  
184 of recruitment to VIKING I (baseline in 2013-2015) was 52. Analysis of the NHS cancer registry (SMR06)  
185 dataset shows that one of the female c.517-2A>G carrier participants has a diagnosis of breast cancer, and  
186 one of ovarian cancer. None of the other seven carriers (four females and three males) had any cancer  
187 code recorded, or codes in the hospital admissions (SMR01) dataset for relevant risk-reducing surgery,  
188 and all nine were alive in 2021. Volunteers also complete study questionnaire sections on family history of  
189 disease, and this reveals that two obligate carriers – parents of participants, through which they link to  
190 other carriers – were affected with cancer. One of these cancers (in a father) was non-Hodgkin's  
191 lymphoma, for which there is some evidence of association with pathogenic variants in *BRCA2* (29).

#### 192 *The landscape of BRCA1 and BRCA2 pathogenic variants in the Northern Isles*

193 Apart from the two founder variants (*BRCA1* c.5207T>C; *BRCA2* c.517-2A>G), in our ~4,200-person  
194 Northern Isles sample, only four other actionable BRCA variants are observed, all of them singletons in  
195 *BRCA2* (Supplementary Table 1). Two of these were inherited by participants from non-Northern Isles  
196 parents, meaning that 93.5% of actionable BRCA variant carriers in Northern Isles genomes are accounted  
197 for by the two drifted variants. One of the singletons inherited from outside the Isles (from a NE Scottish  
198 Mainland-born parent) was the NE Scottish founder variant *BRCA2* c.6275\_6276del p.Leu2092fs (also



199 called 6503delTT; rs11571658 (30)). The other noted West Central Scottish founder variant, *BRCA1*  
200 2800delIAA (31), was absent from our cohorts.

### 201 *Allele frequencies of founder BRCA variants*

202 To explore further how common the drifted c.517-2A>G *BRCA2* variant is across Shetland, we filtered our  
203 population for people with four grandparents, and therefore their entire genome, from the Isle of  
204 Whalsay. While there will be large confidence intervals, the point estimate of the carrier frequency is  
205 2.3%, or one in 43 people from this isle, five-fold higher than in a general sample of Shetlanders, where  
206 the carrier frequency is 1/234 (Table 2). For comparison, we have also analysed data from Orkney for the  
207 drifted *BRCA1* c.5207T>C variant, filtering for people with one or more grandparents from the Isle of  
208 Westray, Orkney. The genetic drift is more extreme, with a carrier frequency estimate of 5.2% or 1 in 19  
209 Westray genome equivalents, again five-fold higher than in a general sample of Orcadians. These  
210 otherwise rare pathogenic alleles are therefore 700-2300 times more common in these isles than in the  
211 general UK Biobank population (Table 2). For added context, numbers are also given in Table 2 for the  
212 well-known Icelandic *BRCA2* (6) and Ashkenazi Jewish *BRCA1* and *BRCA2* pathogenic alleles (7), with  
213 carrier frequencies between 1 in 138 in Iceland and 1 in 41 for the combination of three variants in the  
214 Ashkenazi community.

215  
216 The frequency estimates of BRCA variants in the Northern Isles of Scotland are in total somewhat higher  
217 than among women in the UK in general. For example, 1/293 women in UK Biobank are carriers of  
218 pathogenic / likely pathogenic (with at least 2 star status in ClinVar) or predicted protein-truncating  
219 variants in *BRCA1/2* (32). Hence, the proportion carrying a potentially damaging BRCA variant in Orkney  
220 (1/105) is more than twice that elsewhere in the UK. However, as shown in Table 2, it is when the  
221 individual isle of origin is considered that the carrier frequencies rise an order of magnitude (e.g. 1/43 in  
222 Whalsay, 1/19 in Westray), similar to the 1/41 observed for Ashkenazi Jews (three founder variants).

### 223 *Other breast cancer susceptibility genes*

224 Variants in the ataxia telangiectasia mutated gene *ATM* can increase the risk of breast cancer, though the  
225 gene is not on the ACMG v3.2 list of recommendations for reporting secondary findings in clinical exome

226 and genome sequencing (33). A pathogenic coding variant in *ATM* (c.7271T>G p.Val2424Gly; rs28904921,  
227 ClinVar VCV000003023) was described in an Orkney pedigree in 1998 (34), the “core” family. The variant is  
228 rare but widespread globally, and case-control studies indicate it is strongly associated ( $OR \sim 10$ ) with  
229 breast cancer (35, 36). In the ORCADES research cohort, we recovered the same previously reported  
230 family (34). Beyond the previously reported three heterozygotes and three homozygotes, we identified  
231 one further heterozygote closely related to this family.

232 Two further *ATM* p.Val2424Gly carriers were found, one is a seventh degree relative of the core family. In  
233 total there are 6 alleles out of 4,180 sequenced in ORCADES = 0.14%. For comparison, in the UK Biobank  
234 there are 91 alleles out of 917,638 European alleles sequenced = 0.0099%, thus there is a moderate uplift  
235 in Orkney (~15-fold). We know from questionnaire data that a large number of first and second-degree  
236 relatives of the carriers in the core family are alive but not in the ORCADES study, some of whom may  
237 have volunteered to join the online study VIKING II (18). This may allow a better delineation of the size of  
238 the kindred, and more accurate estimation of the frequency and any impact of the variant on breast  
239 cancer risk in the Northern Isles of Scotland.

240 The relatively common loss-of-function c.1100del variant in *CHEK2* (rs555607708, ClinVar VCV000128042)  
241 imparts a moderate risk of breast and prostate cancer, even in individuals unselected for family history  
242 (37, 38). We observed only four heterozygous carriers of this variant, two from ORCADES and two from  
243 VIKING I, giving an estimated minor allele frequency of 0.048% in the Northern Isles. This is five-fold lower  
244 than the 0.24% seen in UK Biobank. It is notable that three of these four carriers in the Viking Genes  
245 cohorts derive half their genomes from Lowland Scotland, and in one individual we know the allele must  
246 have originated from the Scottish Mainland parent. This suggests c.1100del was rare-to-absent in the pre-  
247 WWII Northern Isles gene pool (due to genetic drift), but appears today due to post-WWII immigration  
248 from the rest of the British Isles. Like *ATM*, *CHEK2* is not on the ACMG3.2 gene list of recommendations  
249 for reporting incidental findings (33), but discussions related to the inclusion of further moderate  
250 penetrance breast cancer genes, including both *ATM* and *CHEK2*, are ongoing (39); both of the above  
251 variants are tested clinically in the UK, according to set guidelines (40).

252 No pathogenic exonic variants in other genes which confer an increased risk of breast cancer were  
253 discovered: *TP53*, *PALB2*, *STK11*, *PTEN* – suggesting these are also essentially absent from the Northern  
254 Isles gene pools. Moreover, none of the *BRCA2* c.517-2A>G carriers in VIKING I also carry known  
255 pathogenic exonic variants in the cancer susceptibility genes *APC*, *BRCA1*, *RET*, *MAX*, *TMEM127*, *BMPR1A*,  
256 *SMAD4*, *MLH1*, *MSH2*, *MSH6*, *PMS2*, *MEN1*, *MUTYH*, *NF2*, *SDHD*, *SDHAF2*, *SDHC*, *SDHB*, *RB1*, *VHL* or *WT1*.  
257 In the Northern Isles, the effects of random genetic drift over the centuries have thus simplified the  
258 landscape of highly penetrant variants of large effect, such that two variants account for almost all of the  
259 risk arising from rare pathogenic hereditary breast and ovarian cancer variants, while the impact of all  
260 others is negligible. Clearly, high penetrance genes contribute only a proportion of genetic cancer risk,  
261 whereas common low penetrance variants identified through genome-wide association studies explain a  
262 further component, as of course do environmental exposures.

263

## 264 Discussion

265 We recurrently identified the pathogenic *BRCA2* variant c.517-2A>G in the population of Shetland, both in  
266 clinical practice and in a population cohort. The variant is found in ~0.4% of Shetlanders. All carriers in the  
267 Shetland cohort VIKING I share the same haplotype background, which is distinct from that observed in  
268 English UK Biobank carriers, pointing to recurrent mutation at the site. Genealogical analysis suggests the  
269 variant is likely to have originated or arrived in a founder individual from Whalsay, Shetland, over 300  
270 years ago. The presence of the same variant in a Japanese study, and in five non-white individuals in  
271 CanVar, provides further evidence that this variant has arisen more than once worldwide.

272 Individuals not ascertained by cascade testing of relatives from the clinical pedigrees were identified in  
273 the population-based sample. In previous work on the *KCNH2* variant p.Gly584Ser (13), which increases  
274 risk of long QT syndrome, and on *BRCA1* p.Val1736Ala (12), we similarly identified carriers in our Northern  
275 Isles research populations who could not have been ascertained from family-based cascade testing. This  
276 highlights the value of research cohorts in uncovering rare clinical variants, which may in turn help  
277 planning and implementation of genetic services. Our online cohort study, VIKING II, which has recruited  
278 volunteers with Northern Isles grandparents irrespective of domicile (18), has highlighted scientifically for

279 the first time the extent of emigration. Significant Northern Isles diasporas are found in mainland  
280 Scotland, former British colonies, particularly New Zealand, Canada and Australia, and also in England, all  
281 locations where these alleles are therefore likely to be important for some families.

282 We show that the frequency estimates of pathogenic BRCA alleles in Orkney and Shetland are somewhat  
283 higher than those for women living in other areas of the UK. We have also demonstrated that variation in  
284 *ATM* and *CHEK2* does not contribute significantly to breast cancer in Orcadians. However, the overall  
285 numbers affected by high penetrance variants will be low, given the modest population sizes. In the most  
286 recent census for which data is available (2011), the population of Whalsay was 1,061 and of Westray,  
287 588, while Shetland and Orkney had 23,167 and 21,279 inhabitants, respectively. The size of the extensive  
288 diasporas is unknown. Given the combined population of over 64,000 in 1861 and the estimated number  
289 of living descendants that would arise in line with European population growth rates in this period, we  
290 speculate that the diasporas number in the hundreds of thousands, although the great majority will have  
291 inherited only a fraction of their genomes from Northern Isles ancestors. Ongoing isolate breakdown, due  
292 to continued immigration to the isles, but also increased within-archipelago migration and mixing, are  
293 expected to similarly result in dilution of these high Northern Isles frequencies over time.

294 High penetrance *BRCA1* and *BRCA2* founder pathogenic variants have been described in several  
295 populations such as the Ashkenazim, Icelanders, Poles, Norwegians and others (8). Testing for these  
296 variants is increasingly well established in both clinical (<https://www.nhsjewishbrcaprogramme.org.uk/>)  
297 and research (41) contexts and cost-effectiveness has been demonstrated in a number of settings. A  
298 recent opinion paper addresses the routine failure to identify many monogenic cases of common diseases,  
299 including breast and ovarian cancer, in clinical settings (42). It aims to focus attention on universal genetic  
300 testing in common diseases for which the recommended clinical management of patients with monogenic  
301 forms of disease diverges from standard management, and has evidence for improved outcomes. In a  
302 step towards this, all women with a diagnosis of a high-grade serous ovarian carcinoma in Scotland  
303 ([https://www.sign.ac.uk/media/2010/sign135\\_oct2022.pdf](https://www.sign.ac.uk/media/2010/sign135_oct2022.pdf)) and Wales, UK, are now tested for  
304 pathogenic *BRCA* variants, without the need for any family history (43, 44). Furthermore, those with  
305 breast cancer under the age of 40, and triple negative breast cancer under 60, regardless of family history,

306 are widely tested in the UK (Supplementary Methods). However, the challenges of potential reduced  
307 penetrance in those without a known family history, and cost, have generally limited adoption of  
308 asymptomatic *BRCA1* and *BRCA2* screening.

309 Homozygosity for pathogenic *BRCA2* variants causes a rare inherited form of bone marrow-associated  
310 acute myeloid leukaemia, solid tumours and developmental anomalies termed Fanconi anaemia. We  
311 estimate that the frequency of Fanconi anaemia in people with Whalsay grandparents could be as high as  
312 1/10,000, considerably higher than the average for Europe of 4-7 per million (45). We propose that  
313 awareness raising of this unlikely possibility in clinicians serving this population is important.

314 Single fragment Sanger sequencing for well characterised founder variants is considerably cheaper than  
315 panel, whole exome or whole genome testing. Thus, testing efficiency would be likely to be considerably  
316 higher in the Northern Isles of Scotland and their diaspora, as we have shown that ~93% of all actionable  
317 variants in *BRCA* genes are accounted for by only two drifted variants. Furthermore, negligible numbers of  
318 variants are segregating at other breast cancer risk genes. This is in sharp contrast with the 424 different  
319 pathogenic or loss-of-function *BRCA1/BRCA2* variants found in UK Biobank females, where 369 variants  
320 account for 93% of all actionable variants (*pers. comm.* L. Jackson, University of Exeter, from analysis of  
321 pathogenic variants as described in (32)). This considerable simplification of the gene pool in genetic  
322 isolates, predicted to be an important factor in gene mapping study designs (46), may in fact be more  
323 critical when considering genomic medicine screening in these populations. There is a case for offering all  
324 Orcadian and Shetlandic women testing for the relevant drifted pathogenic *BRCA* variant, particularly  
325 those with Westray or Whalsay ancestry. A pilot of self-administered saliva-based testing is underway for  
326 the *BRCA1* variant in Westray. Given current fiscal constraints and the somewhat lower frequency of the  
327 Whalsay variant, the immediate recommendation is that testing for *BRCA2* c.517-2A>G should be offered  
328 to those of Whalsay ancestry with a first-degree relative with breast or ovarian cancer, and, to those with  
329 an affected second degree relative connected through an unaffected male.

330 Currently, the consent framework of most research cohorts – including UK Biobank – does not allow the  
331 return of results about carrier status of actionable variants (21). However, participants in such studies  
332 often wish to receive results, particularly about “actionable” findings. This has stimulated publication of

333 an international policy for returning genomic research results (47), and a practical checklist for return of  
334 results from genomic research in the European context (48). Others also recommend the return of results  
335 following detection of hereditary breast and ovarian cancer risk to adult population-based biobank  
336 participants (47, 49, 50). We have therefore invited ORCADES and VIKING I participants to consent to  
337 return of results. In addition, our recent online cohort study VIKING II/III offered members the option of  
338 consent to return of selected clinically actionable results at the point of joining, with an acceptance rate of  
339 98% (18). Future research will explore additional genetically drifted loci in Orkney, Shetland and the  
340 Western Isles of Scotland in the Viking Genes research cohorts, implement the return of results to  
341 consented participants about actionable variants such as the drifted BRCA variants described here, and  
342 evaluate the implementation of saliva-based BRCA testing of DNA in those of Westray and Whalsay  
343 origins.

344

#### 345 **Data Availability Statement**

346 There is neither Research Ethics Committee approval, nor consent from participants, to permit open  
347 release of the individual level research data underlying this study. The datasets generated and analysed  
348 during the current study are therefore not publicly available. Instead, the research data and/or DNA  
349 samples are available from [accessQTL@ed.ac.uk](mailto:accessQTL@ed.ac.uk) on reasonable request, via managed access, following  
350 approval by the Data Access Committee and in line with the consent given by participants.

#### 351 **Acknowledgements**

352 The study team wish to thank staff from the NHS Grampian genetics team and the Viking Genes Study for  
353 their contribution to these datasets. DNA extractions were performed at the Edinburgh Clinical Research  
354 Facility, University of Edinburgh. Sanger sequencing was performed by Camilla Drake and the technical  
355 services team at the MRC HGU. Emily Weiss and Reka Nagy assembled the ORCADES pedigree, and  
356 Barbara Gray the Shetland pedigree, using records at the General Register Office and study information,  
357 building on earlier pedigree work by Ruth McQuillan and Jim Wilson. We thank Thibaud Boutin for phasing  
358 the GSA chip data and Kiera Johnston for help with analysis of other cancer susceptibility genes. The data  
359 in the EHR was provided by patients and collected by the NHS as part of their care and support. We would

360 also like to acknowledge the invaluable contributions of the research nurses in Orkney and Shetland and  
361 the administrative team in Edinburgh, and the NHS Grampian genetic counselling team for counselling of  
362 the carriers identified in the cohorts. Finally, and most importantly, we thank the people of the Northern  
363 Isles for their involvement in and ongoing support for our research.

#### 364 **Author Contribution Statement**

365 SK managed the project and drafted the manuscript. LK analysed the exome datasets. MM and LK did the  
366 haplotype comparisons. EC and LS provided de-identified clinical data. GT and ARS conceived and  
367 managed the Viking Genes exome sequencing. ZM recognised carrier patients through the NHS Grampian  
368 clinical genetics service, led clinical aspects of return of results planning and proposed policy. JFW is the  
369 Chief Investigator of Viking Genes, was awarded funding to implement the work, did genealogical  
370 analyses, interpreted the data and helped draft the manuscript. All authors provided input and feedback  
371 on drafts of the manuscript.

#### 372 **Funding**

373 This work was funded by the MRC University Unit award to the MRC Human Genetics Unit, University of  
374 Edinburgh, MC\_UU\_00007/10 and a Wellcome Trust Institutional Translational Partnership Award  
375 (University of Edinburgh 222060/Z/20/Z -PII031). LK was supported by an RCUK Innovation Fellowship  
376 from the National Productivity Investment Fund (MR/R026408/1).

#### 377 **Ethical Approval**

378 Eligible participants were recruited to ORCADES and the Viking Health Study Shetland (VIKING I), now part  
379 of Viking Genes, Research Ethics Committee reference 19/SS/0104. Research participants gave written  
380 informed consent for research procedures that included electronic health record linkage and DNA  
381 sequencing. The data linkage and access to NHS Scotland-originated data for ORCADES and VIKING I was  
382 approved by the Public Benefit and Privacy Panel for Health and Social Care (Ref 1718-0380). This research  
383 has also been conducted using data from UK Biobank, as part of project number 19655. Frequencies for  
384 the *ATM* and *CHEK2* variants reported here, and the *BRCA2* variant c.517-2A>G numbers in Table 1, were  
385 derived from the UK Biobank Whole Genome Sequencing (WGS) project and were obtained from the UK

386 Biobank Allele Frequency Browser ([afb.ukbiobank.ac.uk](http://afb.ukbiobank.ac.uk)), which was generated by the WGS consortium  
387 under the UK Biobank Resource (project ID 52293).

388

### 389 **Competing Interests**

390 AS and GT are employees and/or stockholders of Regeneron Genetics Center or Regeneron  
391 Pharmaceuticals.

392

393 For the purpose of open access, the author has applied a Creative Commons Attribution (CC BY) licence to  
394 any Author Accepted Manuscript version arising from this submission.

395

### 396 **References**

- 397 1. Antoniou A, Pharoah PD, Narod S, Risch HA, Eyfjord JE, Hopper JL, et al. Average risks of breast  
398 and ovarian cancer associated with BRCA1 or BRCA2 mutations detected in case Series unselected for  
399 family history: a combined analysis of 22 studies. *Am J Hum Genet.* 2003;72(5):1117-30.
- 400 2. Kuchenbaecker KB, Hopper JL, Barnes DR, Phillips KA, Mooij TM, Roos-Blom MJ, et al. Risks of  
401 Breast, Ovarian, and Contralateral Breast Cancer for BRCA1 and BRCA2 Mutation Carriers. *JAMA.*  
402 2017;317(23):2402-16.
- 403 3. Cline MS, Liao RG, Parsons MT, Paten B, Alquaddoomi F, Antoniou A, et al. BRCA Challenge: BRCA  
404 Exchange as a global resource for variants in BRCA1 and BRCA2. *PLoS Genet.* 2018;14(12):e1007752.
- 405 4. Li S, Silvestri V, Leslie G, Rebbeck TR, Neuhausen SL, Hopper JL, et al. Cancer Risks Associated With  
406 BRCA1 and BRCA2 Pathogenic Variants. *J Clin Oncol.* 2022;40(14):1529-41.
- 407 5. Thorlacius S, Sigurdsson S, Bjarnadottir H, Olafsdottir G, Jonasson JG, Tryggvadottir L, et al. Study  
408 of a single BRCA2 mutation with high carrier frequency in a small population. *Am J Hum Genet.*  
409 1997;60(5):1079-84.
- 410 6. Jensson BO, Arnadottir GA, Katrinardottir H, Fridriksdottir R, Helgason H, Oddsson A, et al.  
411 Actionable Genotypes and Their Association with Life Span in Iceland. *N Engl J Med.* 2023;389(19):1741-  
412 52.



- 413 7. Hamel N, Kotar K, Foulkes WD. Founder mutations in BRCA1/2 are not frequent in Canadian  
414 Ashkenazi Jewish men with prostate cancer. *BMC Med Genet.* 2003;4:7.
- 415 8. Rubinstein WS. Hereditary breast cancer in Jews. *Fam Cancer.* 2004;3(3-4):249-57.
- 416 9. Abul-Husn NS, Soper ER, Odgis JA, Cullina S, Bobo D, Moscati A, et al. Exome sequencing reveals a  
417 high prevalence of BRCA1 and BRCA2 founder variants in a diverse population-based biobank. *Genome*  
418 *Med.* 2019;12(1):2.
- 419 10. Gilbert E, O'Reilly S, Merrigan M, McGettigan D, Vitart V, Joshi PK, et al. The genetic landscape of  
420 Scotland and the Isles. *Proc Natl Acad Sci U S A.* 2019;116(38):19064-70.
- 421 11. Halachev M, Meynert A, Taylor MS, Vitart V, Kerr SM, Klaric L, et al. Increased ultra-rare variant  
422 load in an isolated Scottish population impacts exonic and regulatory regions. *PLoS Genet.*  
423 2019;15(11):e1008480.
- 424 12. Kerr SM, Cowan E, Klaric L, Bell C, O'Sullivan D, Buchanan D, et al. Clinical case study meets  
425 population cohort: identification of a BRCA1 pathogenic founder variant in Orcadians. *Eur J Hum Genet.*  
426 2023;31(5):588-95.
- 427 13. Kerr SM, Klaric L, Halachev M, Hayward C, Boutin TS, Meynert AM, et al. An actionable KCNH2  
428 Long QT Syndrome variant detected by sequence and haplotype analysis in a population research cohort.  
429 *Sci Rep.* 2019;9(1):10964.
- 430 14. Parsons MT, Tudini E, Li H, Hahnen E, Wappenschmidt B, Feliubadalo L, et al. Large scale  
431 multifactorial likelihood quantitative analysis of BRCA1 and BRCA2 variants: An ENIGMA resource to  
432 support clinical variant classification. *Hum Mutat.* 2019;40(9):1557-78.
- 433 15. Landrum MJ, Chitipiralla S, Brown GR, Chen C, Gu B, Hart J, et al. ClinVar: improvements to  
434 accessing data. *Nucleic Acids Res.* 2020;48(D1):D835-D44.
- 435 16. Houdayer C, Caux-Moncoutier V, Krieger S, Barrois M, Bonnet F, Bourdon V, et al. Guidelines for  
436 splicing analysis in molecular diagnosis derived from a set of 327 combined in silico/in vitro studies on  
437 BRCA1 and BRCA2 variants. *Hum Mutat.* 2012;33(8):1228-38.

- 438 17. Casadei S, Gulsuner S, Shirts BH, Mandell JB, Kortbawi HM, Norquist BS, et al. Characterization of  
439 splice-altering mutations in inherited predisposition to cancer. *Proc Natl Acad Sci U S A*.  
440 2019;116(52):26798-807.
- 441 18. Kerr S, Edwards R, Buchanan D, Dean J, Miedzybrodzka Z, Wilson J. VIKING II, a Worldwide  
442 Observational Cohort of Volunteers with Northern Isles Ancestry. *International Journal of Population Data*  
443 *Science*. 2023;8(1).
- 444 19. Allen NE, Lacey B, Lawlor DA, Pell JP, Gallacher J, Smeeth L, et al. Prospective study design and  
445 data analysis in UK Biobank. *Sci Transl Med*. 2024;16(729):eadf4428.
- 446 20. Bycroft C, Freeman C, Petkova D, Band G, Elliott LT, Sharp K, et al. The UK Biobank resource with  
447 deep phenotyping and genomic data. *Nature*. 2018;562(7726):203-9.
- 448 21. Van Hout CV, Tachmazidou I, Backman JD, Hoffman JD, Liu D, Pandey AK, et al. Exome sequencing  
449 and characterization of 49,960 individuals in the UK Biobank. *Nature*. 2020;586(7831):749-56.
- 450 22. Backman JD, Li AH, Marcketta A, Sun D, Mbatchou J, Kessler MD, et al. Exome sequencing and  
451 analysis of 454,787 UK Biobank participants. *Nature*. 2021;599(7886):628-34.
- 452 23. Delaneau O, Howie B, Cox AJ, Zagury JF, Marchini J. Haplotype estimation using sequencing reads.  
453 *Am J Hum Genet*. 2013;93(4):687-96.
- 454 24. O'Connell J, Gurdasani D, Delaneau O, Pirastu N, Ulivi S, Cocca M, et al. A general approach for  
455 haplotype phasing across the full spectrum of relatedness. *PLoS Genet*. 2014;10(4):e1004234.
- 456 25. Chen S, Francioli LC, Goodrich JK, Collins RL, Kanai M, Wang Q, et al. A genome-wide mutational  
457 constraint map quantified from variation in 76,156 human genomes. *bioRxiv*. 2022:2022.03.20.485034.
- 458 26. Li S, Carss KJ, Halldorsson BV, Cortes A, Consortium UBW-GS. Whole-genome sequencing of half-a-  
459 million UK Biobank participants. *medRxiv*. 2023:2023.12.06.23299426.
- 460 27. Chubb D, Broderick P, Dobbins SE, Houlston RS. CanVar: A resource for sharing germline variation  
461 in cancer patients. *F1000Res*. 2016;5:2813.
- 462 28. Liu Y, Ide Y, Inuzuka M, Tazawa S, Kanada Y, Matsunaga Y, et al. BRCA1/BRCA2 mutations in  
463 Japanese women with ductal carcinoma in situ. *Mol Genet Genomic Med*. 2019;7(3):e493.

- 464 29. Usui Y, Iwasaki Y, Matsuo K, Endo M, Kamatani Y, Hirata M, et al. Association between germline  
465 pathogenic variants in cancer-predisposing genes and lymphoma risk. *Cancer Sci.* 2022;113(11):3972-9.
- 466 30. Scottish/Northern Irish BBC. BRCA1 and BRCA2 mutations in Scotland and Northern Ireland. *Br J*  
467 *Cancer.* 2003;88(8):1256-62.
- 468 31. Liede A, Cohen B, Black DM, Davidson RH, Renwick A, Hoodfar E, et al. Evidence of a founder  
469 BRCA1 mutation in Scotland. *Br J Cancer.* 2000;82(3):705-11.
- 470 32. Jackson L, Weedon MN, Green HD, Mallabar-Rimmer B, Harrison JW, Wood AR, et al. Influence of  
471 family history on penetrance of hereditary cancers in a population setting. *EClinicalMedicine.*  
472 2023;64:102159.
- 473 33. Miller DT, Lee K, Abul-Husn NS, Amendola LM, Brothers K, Chung WK, et al. ACMG SF v3.2 list for  
474 reporting of secondary findings in clinical exome and genome sequencing: A policy statement of the  
475 American College of Medical Genetics and Genomics (ACMG). *Genet Med.* 2023;25(8):100866.
- 476 34. Stankovic T, Kidd AM, Sutcliffe A, McGuire GM, Robinson P, Weber P, et al. ATM mutations and  
477 phenotypes in ataxia-telangiectasia families in the British Isles: expression of mutant ATM and the risk of  
478 leukemia, lymphoma, and breast cancer. *Am J Hum Genet.* 1998;62(2):334-45.
- 479 35. Southey MC, Goldgar DE, Winqvist R, Pylkas K, Couch F, Tischkowitz M, et al. PALB2, CHEK2 and  
480 ATM rare variants and cancer risk: data from COGS. *J Med Genet.* 2016;53(12):800-11.
- 481 36. Moslemi M, Moradi Y, Dehghanbanadaki H, Afkhami H, Khaledi M, Sedighimehr N, et al. The  
482 association between ATM variants and risk of breast cancer: a systematic review and meta-analysis. *BMC*  
483 *Cancer.* 2021;21(1):27.
- 484 37. Woodward ER, van Veen EM, Forde C, Harkness EF, Byers HJ, Ellingford JM, et al. Clinical utility of  
485 testing for PALB2 and CHEK2 c.1100delC in breast and ovarian cancer. *Genet Med.* 2021;23(10):1969-76.
- 486 38. Loveday C, Garrett A, Law P, Hanks S, Poyastro-Pearson E, Adlard JW, et al. Analysis of rare  
487 disruptive germline mutations in 2135 enriched BRCA-negative breast cancers excludes additional high-  
488 impact susceptibility genes. *Ann Oncol.* 2022;33(12):1318-27.

- 489 39. Miller DT, Lee K, Abul-Husn NS, Amendola LM, Brothers K, Chung WK, et al. ACMG SF v3.1 list for  
490 reporting of secondary findings in clinical exome and genome sequencing: A policy statement of the  
491 American College of Medical Genetics and Genomics (ACMG). *Genet Med.* 2022;24(7):1407-14.
- 492 40. Evans DG, Green K, Burghel GJ, Forde C, Lalloo F, Schlecht H, et al. Cascade screening in HBOC and  
493 Lynch syndrome: guidelines and procedures in a UK centre. *Familial Cancer.* 2024.
- 494 41. Stefansdottir V, Thorolfsdottir E, Hognason HB, Patch C, van El C, Hentze S, et al. Web-based  
495 return of BRCA2 research results: one-year genetic counselling experience in Iceland. *Eur J Hum Genet.*  
496 2020;28(12):1656-61.
- 497 42. Murray MF, Khoury MJ, Abul-Husn NS. Addressing the routine failure to clinically identify  
498 monogenic cases of common disease. *Genome Med.* 2022;14(1):60.
- 499 43. Rust K, Spiliopoulou P, Tang CY, Bell C, Stirling D, Phang T, et al. Routine germline BRCA1 and  
500 BRCA2 testing in patients with ovarian carcinoma: analysis of the Scottish real-life experience. *BJOG.*  
501 2018;125(11):1451-8.
- 502 44. Kansu B, Gardner J, Price-Tate R, Murch O, Murray A. BRCA gene testing in women with high-  
503 grade serous ovarian carcinoma. *J Obstet Gynaecol.* 2021;41(6):962-5.
- 504 45. Gulbis B, Eleftheriou A, Angastiniotis M, Ball S, Surralles J, Castella M, et al. Epidemiology of rare  
505 anaemias in Europe. *Adv Exp Med Biol.* 2010;686:375-96.
- 506 46. Wright AF, Carothers AD, Pirastu M. Population choice in mapping genes for complex diseases.  
507 *Nat Genet.* 1999;23(4):397-404.
- 508 47. Lewis ACF, Knoppers BM, Green RC. An international policy on returning genomic research results.  
509 *Genome Med.* 2021;13(1):115.
- 510 48. Vears DF, Hallowell N, Bentzen HB, Ellul B, Nost TH, Kerasidou A, et al. A practical checklist for  
511 return of results from genomic research in the European context. *Eur J Hum Genet.* 2023;31(6):687-95.
- 512 49. Leitsalu L, Palover M, Sikka TT, Reigo A, Kals M, Pärn K, et al. Genotype-first approach to the  
513 detection of hereditary breast and ovarian cancer risk, and effects of risk disclosure to biobank  
514 participants. *European Journal of Human Genetics.* 2021;29(3):471-81.

515 50. Manickam K, Buchanan AH, Schwartz MLB, Hallquist MLG, Williams JL, Rahm AK, et al. Exome  
516 Sequencing–Based Screening for BRCA1/2 Expected Pathogenic Variants Among Adult Biobank  
517 Participants. JAMA Network Open. 2018;1(5):e182140-e.

518

519 **Figure and Table Legends**

520 **Figure 1. Grandparental ancestry of *BRCA2* c.517-2A>G carriers in VIKING I.** The first seven bars are  
521 parishes or isles of Shetland. The remainder are locations elsewhere in the UK. Of all 36 grandparents of  
522 the carriers, 14 (39%) were from Whalsay, with most of the remainder coming from other parishes or isles  
523 of Shetland.

524  
525 **Figure 2. Outline pedigree of a large kindred from the VIKING I study.** The founder of the kindred was  
526 born in Whalsay in 1786, and all descendants enclosed by the blue line were also born there. He had  
527 children by two wives. Red outlines are sequenced *BRCA2* c.517-2A>G carriers in VIKING I, dotted red  
528 outlines are obligate carriers (parents of carriers, who link to other carriers). Sequenced VIKING I  
529 participants without the variant are shown in green. There are many other family members not shown.

530  
531 **Figure 3. Visualisation of haplotype sharing across nine Shetland carriers.** The phased Illumina GSA chip  
532 genotypes across an 8 Mb region on chromosome 13 are represented for one haplotype from each  
533 individual. The pathogenic variant is at 32.33 Mb and a multi-Mb identical-by-descent block is apparent in  
534 the centre of the plot. For close relatives, the extent of sharing goes beyond the window shown. Mb,  
535 megabase.

536  
537 **Table 1. Frequencies of *BRCA2* c.517-2A>G carriers in genomic datasets.** The numbers of carriers are  
538 reported for diverse genomic datasets. gnomAD, genome aggregation database; CanVar-UK, Cancer  
539 Predisposition Gene Variant Database.

540  
541 **Table 2. Carrier frequency estimates of *BRCA* founder variants in the Northern Isles of Scotland and  
542 comparison populations.** UKB-EU, UK Biobank European-heritage, exome data reported by CanVar-UK  
543 v2.2 release date July 2023 (27). Westray estimates use data from ORCADES on n=1461 self-reported  
544 Westray-born grandparents, or 365.25 full Westray genome equivalents. Whalsay estimates use VIKING I  
545 individuals with all four grandparents born in Whalsay. N, number of carriers. "One in" gives the reciprocal

546 of the carrier frequency, e.g. one in 105 individuals. Allele frequencies are half the carrier frequencies, for  
547 variants such as these, where no homozygotes are observed. Uplift presents the fold uplift in frequency  
548 over and above that in UK Biobank European-heritage. The total number of individuals for the sum of the  
549 three Ashkenazi founder variants is taken as the average of the counts for the three individual variants.  
550 *BRCA2* 517-2A>G is rs81002858; *BRCA1* c.5207T>C is rs45553935; *BRCA2* c.771\_775 del is rs80359671;  
551 *BRCA1* c.68\_69del is rs80357914; *BRCA1* c.5266dup is rs80357906; *BRCA2* c.5946del is rs80359550.

552

553 **Supplementary Table 1 Actionable BRCA1/2 variants in Orkney and Shetland.** Pathogenic or likely  
554 pathogenic variants in *BRCA1* or *BRCA2* among 4198 exomes from the Northern Isles. All six variants have  
555 3\* status in ClinVar as pathogenic and were reviewed by an expert panel, all are autosomal dominant. c.  
556 gives the coding DNA position and change; p, the protein position and change; rsid, reference SNP cluster  
557 ID; GRCh38, Genome Reference Consortium human build 38; LOF, loss of function.

558

| <b>Dataset</b>                          | <b>Description</b>                                                | <b>Number of Individuals</b>   | <b>Carriers of <i>BRCA2</i> c.517-2A&gt;G variant</b> | <b>Non-European Carriers</b> |
|-----------------------------------------|-------------------------------------------------------------------|--------------------------------|-------------------------------------------------------|------------------------------|
| gnomAD v4.0                             | Unrelated European (non-Finnish) individuals from genetic studies | 549,120 exome sequences        | 14                                                    | 0                            |
| Viking Health Study Shetland (VIKING I) | Isolate population cohort from Shetland, UK                       | 2,108 exome sequences          | 9                                                     | 0                            |
| Orkney Complex Disease Study (ORCADES)  | Isolate population cohort from Orkney, UK                         | 2,090 exome sequences          | 0                                                     | 0                            |
| UK Biobank                              | Cosmopolitan population cohort from UK                            | 458,838 whole genome sequences | 15                                                    | 0                            |
| CanVar-UK                               | Sequenced cancer genes of NHS cancer patients England & Wales     | 80,722 total probands tested   | 35                                                    | 5                            |
| Japanese women with breast cancer       | Direct sequencing of <i>BRCA1</i> and <i>BRCA2</i> genes          | 325 women with breast cancer   | 1                                                     | 1                            |

**Table 1. Frequencies of *BRCA2* c.517-2A>G carriers in genomic datasets.**



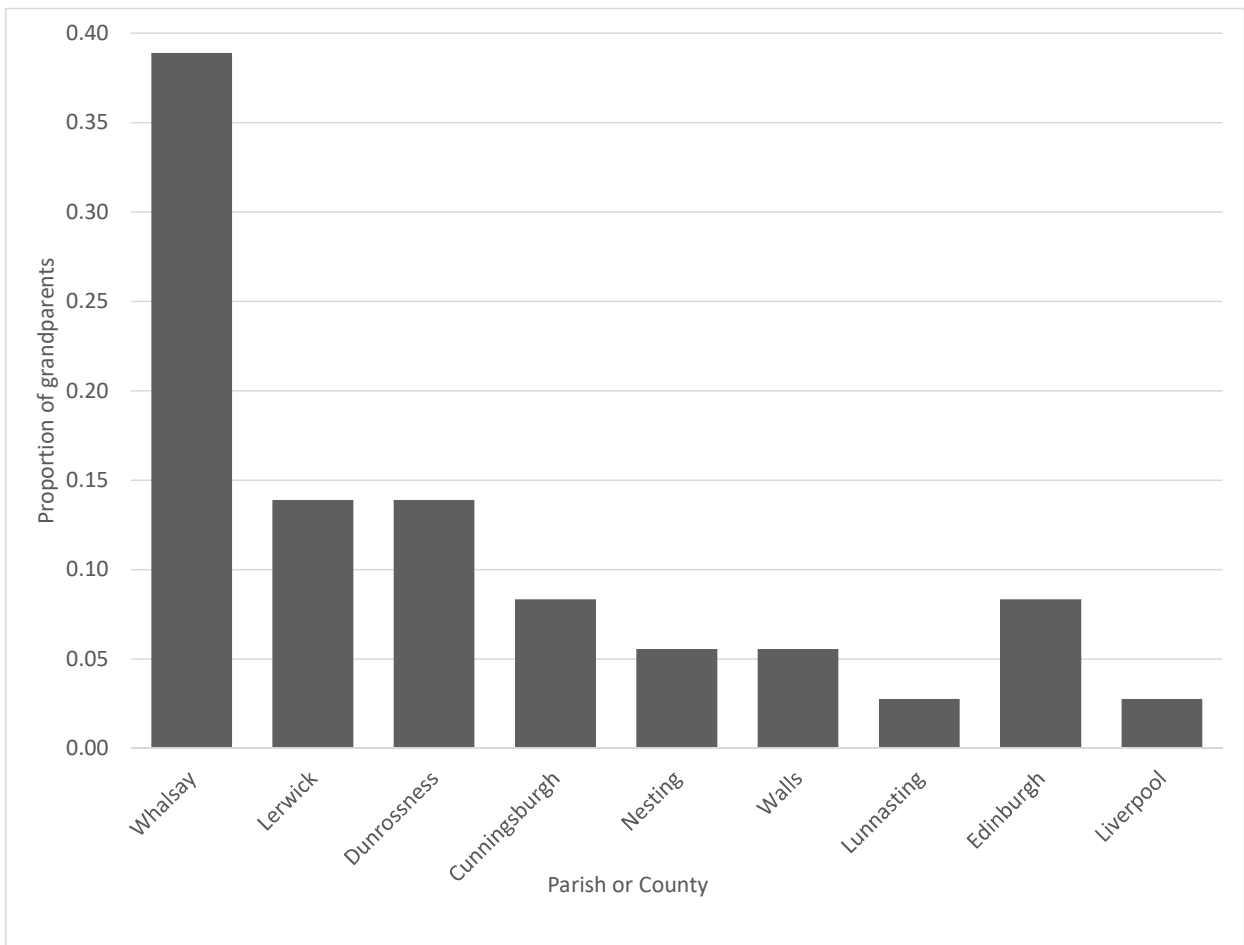



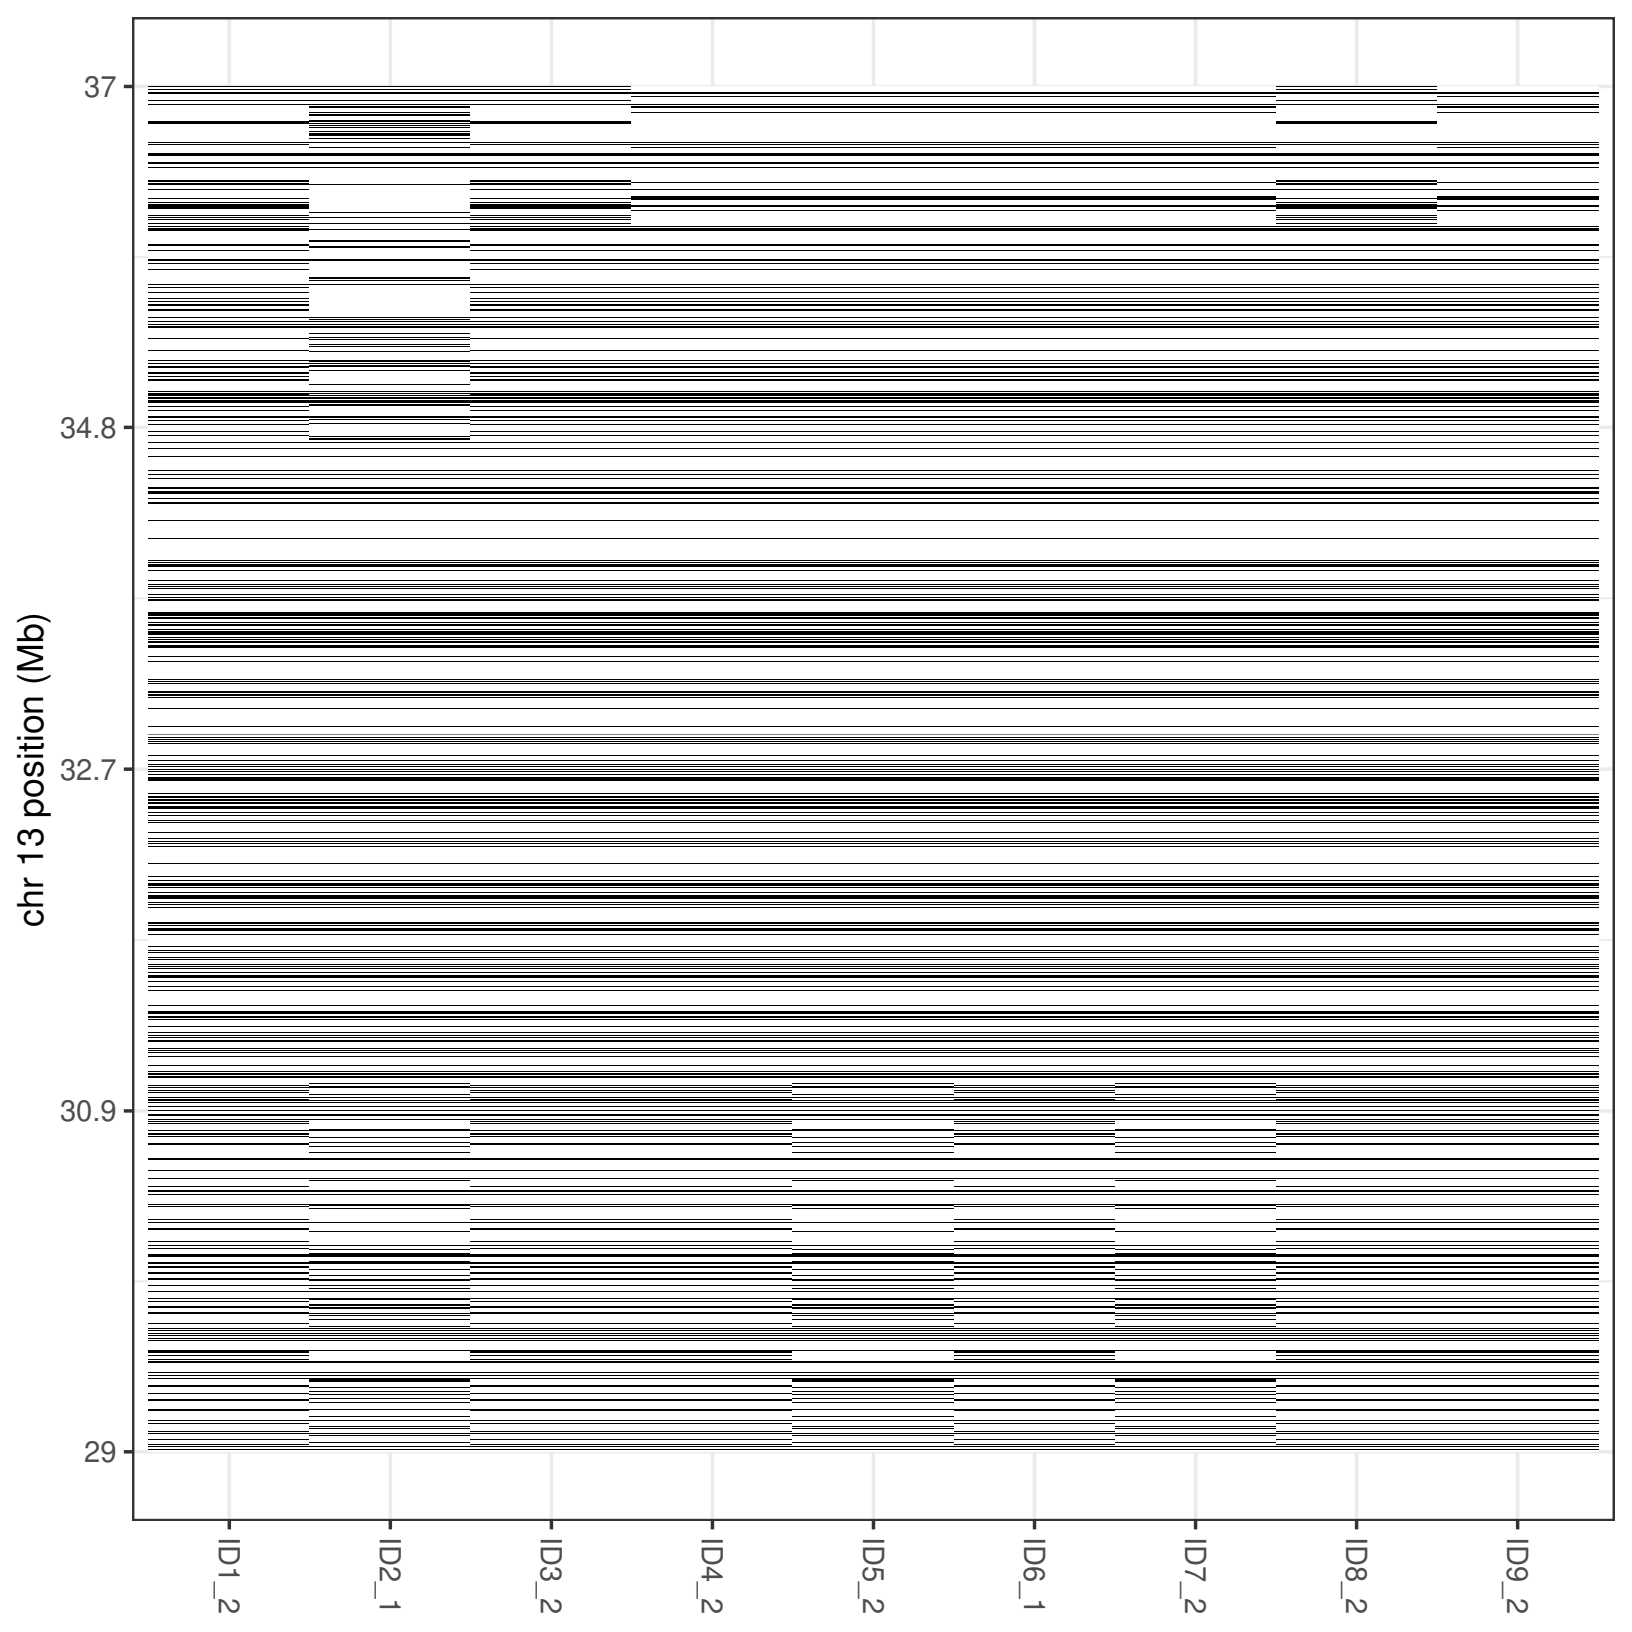

| Variant                                     | Population        | N   | Total   | Frequency | %           | One in     | Uplift | Reference     |
|---------------------------------------------|-------------------|-----|---------|-----------|-------------|------------|--------|---------------|
| <b>BRCA2</b><br>c.517-2A>G                  | UKB-EU            | 14  | 432,222 | 3.24E-05  | 0.0032      | 30,873     |        | 27            |
|                                             | Shetlanders       | 9   | 2108    | 0.0043    | <b>0.43</b> | <b>234</b> | 132    | current study |
|                                             | Whalsay           | 3   | 129     | 0.023     | <b>2.3</b>  | <b>43</b>  | 718    | current study |
| <b>BRCA1</b><br>c.5207T>C                   | UKB-EU            | 10  | 442,259 | 2.26E-05  | 0.0023      | 44,226     |        | 27            |
|                                             | Orcadians         | 20  | 2090    | 0.0096    | <b>0.96</b> | <b>105</b> | 423    | 3             |
|                                             | Westray           | 19  | 365.25  | 0.052     | <b>5.2</b>  | <b>19</b>  | 2301   | current study |
| <b>BRCA2</b><br>c.771_775del<br>(999del5)   | Icelanders        | 421 | 57,933  | 0.0073    | <b>0.73</b> | 138        |        | 14            |
| <b>BRCA1</b><br>c.68_69del<br>(185delAG)    | Ashkenazi<br>Jews | 85  | 9371    | 0.0091    | <b>0.91</b> | 110        |        | 15            |
| <b>BRCA1</b><br>c.5266dup<br>(5382insC)     | Ashkenazi<br>Jews | 24  | 8867    | 0.0027    | <b>0.27</b> | 369        |        | 15            |
| <b>BRCA2</b><br>c.5946del<br>(6174delT)     | Ashkenazi<br>Jews | 119 | 9514    | 0.012     | <b>1.2</b>  | 80         |        | 15            |
| <b>3 Ashkenazi<br/>founder<br/>variants</b> | Ashkenazi<br>Jews | 228 | ~9250   | 0.024     | <b>2.4</b>  | <b>41</b>  |        | 15            |

Table 2. Carrier frequency estimates of *BRCA* founder variants in the Northern Isles of Scotland and comparison populations.
